# Supplementary material for: Monitoring the interplay between transposable element families and DNA methylation in maize
Source: PLoS Genet. 2019 Sep 9;15(9):e1008291. doi: 10.1371/journal.pgen.1008291 (PMC6752859; doi:10.1371/journal.pgen.1008291)
Supplement: S2 Table — (XLSX) [file pgen.1008291.s002.xlsx]

## Sheet: Table_S2
Table S2: Whole Genome Bisulfite Sequencing Metadata
Sample ID	Data Location	Ref	Samples	Alignment Genome	Reads	Mapping Rate	Tiles with Data	Tiles with Coverage
B73 Shoot	SRR8738272	NA	1	B73	636294670	0.65	0.95	0.81
B73 Root	SRR8740850	NA	1	B73	230772157	0.65	0.94	0.79
B73 Leaf	SRR8740851	NA	6	B73	928696652	0.62	0.96	0.76
Mo17 Leaf	SRX3311637	Li et al., 2014	1	Mo17	141635754	0.63	0.91	0.7
PH207 Shoot	SRR8740852	NA	1	PH207	430997520	0.65	0.99	0.98
W22 Leaf	SRR8740853	NA	2	W22	333172392	0.63	0.93	0.79
