# Supplementary material for: Monitoring the interplay between transposable element families and DNA methylation in maize
Source: PLoS Genet. 2019 Sep 9;15(9):e1008291. doi: 10.1371/journal.pgen.1008291 (PMC6752859; doi:10.1371/journal.pgen.1008291)
Supplement: S3 Table — (XLSX) [file pgen.1008291.s003.xlsx]

## Sheet: Sheet1
Table S3: TE family list
Family	Subset	B73 elements	W22 elements	PH207 elements	Mo17 elements
RLG00031	>20 non-nested in all four	127	101	25	115
RLG00035	>20 non-nested in all four	164	214	171	197
RLG00036	>20 non-nested in all four	83	91	22	98
RLG00038	>20 non-nested in all four	106	116	63	91
RLG00039	>20 non-nested in all four	107	101	72	119
RLG00040	>20 non-nested in all four	111	95	59	97
RLG00043	>20 non-nested in all four	98	50	50	60
RLG00047	>20 non-nested in all four	87	62	39	56
RLG00051	>20 non-nested in all four	70	66	54	69
RLG00053	>20 non-nested in all four	100	108	51	100
RLG00055	>20 non-nested in all four	67	74	62	89
RLG00058	>20 non-nested in all four	61	79	69	65
RLG00060	>20 non-nested in all four	81	77	89	90
RLG00072	>20 non-nested in all four	37	37	28	35
RLG00078	>20 non-nested in all four	20	24	28	38
RLG00081	>20 non-nested in all four	36	30	55	30
RLG00087	>20 non-nested in all four	29	34	25	31
RLG00089	>20 non-nested in all four	44	41	37	36
RLG00098	>20 non-nested in all four	32	34	32	23
RLC00124	>20 non-nested in all four	23	25	28	24
RLC00143	>20 non-nested in all four	25	34	24	28
RLX13529	>20 non-nested in all four	93	49	29	35
RLG00103	>20 non-nested in all four	32	28	39	30
RLG00107	>20 non-nested in all four	29	32	31	36
RLG00109	>20 non-nested in all four	24	24	30	28
RLG00110	>20 non-nested in all four	27	37	33	33
RLG00111	>20 non-nested in all four	30	31	26	44
RLG00131	>20 non-nested in all four	25	21	22	26
RLC00002	>20 non-nested in all four	8561	8597	5393	8703
RLC00004	>20 non-nested in all four	5804	5796	3052	5937
RLC00013	>20 non-nested in all four	584	542	272	532
RLC00014	>20 non-nested in all four	493	515	288	495
RLC00015	>20 non-nested in all four	426	366	399	364
RLC00016	>20 non-nested in all four	411	356	167	345
RLC00019	>20 non-nested in all four	312	302	201	292
RLC00022	>20 non-nested in all four	254	236	66	239
RLC00025	>20 non-nested in all four	264	210	133	207
RLC00026	>20 non-nested in all four	236	234	143	224
RLC00029	>20 non-nested in all four	244	235	106	234
RLC00030	>20 non-nested in all four	336	330	216	326
RLC00032	>20 non-nested in all four	273	258	117	272
RLC00033	>20 non-nested in all four	194	156	78	174
RLC00034	>20 non-nested in all four	252	295	139	288
RLC00041	>20 non-nested in all four	121	149	80	123
RLC00042	>20 non-nested in all four	101	85	51	88
RLC00044	>20 non-nested in all four	93	88	62	108
RLC00045	>20 non-nested in all four	106	103	77	86
RLC00046	>20 non-nested in all four	154	147	60	147
RLC00048	>20 non-nested in all four	82	76	87	69
RLC00052	>20 non-nested in all four	97	103	51	102
RLC00054	>20 non-nested in all four	59	68	48	74
RLC00057	>20 non-nested in all four	78	59	74	57
RLC00059	>20 non-nested in all four	52	51	55	53
RLC00062	>20 non-nested in all four	51	42	41	32
RLC00064	>20 non-nested in all four	69	78	36	64
RLC00068	>20 non-nested in all four	32	27	32	32
RLC00069	>20 non-nested in all four	39	43	25	42
RLC00070	>20 non-nested in all four	59	50	36	50
RLC00074	>20 non-nested in all four	55	54	29	57
RLC00075	>20 non-nested in all four	43	30	26	33
RLC00079	>20 non-nested in all four	45	58	51	51
RLC00093	>20 non-nested in all four	35	35	38	44
RLC00097	>20 non-nested in all four	28	23	24	30
RLC00099	>20 non-nested in all four	30	32	36	35
RLX00065	>20 non-nested in all four	69	65	23	70
RLX00094	>20 non-nested in all four	42	48	28	39
RLG00001	>20 non-nested in all four	7514	7632	5931	7711
RLG00003	>20 non-nested in all four	7801	7152	3768	7566
RLG00005	>20 non-nested in all four	1837	1536	530	1744
RLG00006	>20 non-nested in all four	1843	1775	792	1628
RLG00007	>20 non-nested in all four	1601	1557	1195	1573
RLG00008	>20 non-nested in all four	1384	1427	1071	1409
RLG00009	>20 non-nested in all four	814	819	449	775
RLG00010	>20 non-nested in all four	796	792	469	760
RLG00011	>20 non-nested in all four	1174	1179	551	1161
RLG00012	>20 non-nested in all four	698	448	254	431
RLG00017	>20 non-nested in all four	343	274	198	278
RLG00018	>20 non-nested in all four	423	443	466	462
RLG00020	>20 non-nested in all four	286	253	126	244
RLG00021	>20 non-nested in all four	357	387	364	388
RLG00024	>20 non-nested in all four	192	237	114	258
RLG00027	>20 non-nested in all four	93	74	104	341
RLG00028	>20 non-nested in all four	220	231	113	203
RLG00031	>20 non-nested in all four	127	101	25	115
RLG00035	>20 non-nested in all four	164	214	171	197
RLG00036	>20 non-nested in all four	83	91	22	98
RLG00038	>20 non-nested in all four	106	116	63	91
RLG00039	>20 non-nested in all four	107	101	72	119
RLG00040	>20 non-nested in all four	111	95	59	97
RLG00043	>20 non-nested in all four	98	50	50	60
RLG00047	>20 non-nested in all four	87	62	39	56
RLG00051	>20 non-nested in all four	70	66	54	69
RLG00053	>20 non-nested in all four	100	108	51	100
RLG00055	>20 non-nested in all four	67	74	62	89
RLG00058	>20 non-nested in all four	61	79	69	65
RLG00060	>20 non-nested in all four	81	77	89	90
RLG00072	>20 non-nested in all four	37	37	28	35
RLG00078	>20 non-nested in all four	20	24	28	38
RLG00081	>20 non-nested in all four	36	30	55	30
RLG00087	>20 non-nested in all four	29	34	25	31
RLG00089	>20 non-nested in all four	44	41	37	36
RLG00098	>20 non-nested in all four	32	34	32	23
RLC00124	>20 non-nested in all four	23	25	28	24
RLC00143	>20 non-nested in all four	25	34	24	28
RLX13529	>20 non-nested in all four	93	49	29	35
RLG00103	>20 non-nested in all four	32	28	39	30
RLG00107	>20 non-nested in all four	29	32	31	36
RLG00109	>20 non-nested in all four	24	24	30	28
RLG00110	>20 non-nested in all four	27	37	33	33
RLG00111	>20 non-nested in all four	30	31	26	44
RLG00131	>20 non-nested in all four	25	21	22	26
RLC00002	>20 non-nested in all four	8561	8597	5393	8703
RLC00004	>20 non-nested in all four	5804	5796	3052	5937
RLC00013	>20 non-nested in all four	584	542	272	532
RLC00014	>20 non-nested in all four	493	515	288	495
RLC00015	>20 non-nested in all four	426	366	399	364
RLC00016	>20 non-nested in all four	411	356	167	345
RLC00019	>20 non-nested in all four	312	302	201	292
RLC00022	>20 non-nested in all four	254	236	66	239
RLC00025	>20 non-nested in all four	264	210	133	207
RLC00026	>20 non-nested in all four	236	234	143	224
RLC00029	>20 non-nested in all four	244	235	106	234
RLC00030	>20 non-nested in all four	336	330	216	326
RLC00032	>20 non-nested in all four	273	258	117	272
RLC00033	>20 non-nested in all four	194	156	78	174
RLC00034	>20 non-nested in all four	252	295	139	288
RLC00041	>20 non-nested in all four	121	149	80	123
RLC00042	>20 non-nested in all four	101	85	51	88
RLC00044	>20 non-nested in all four	93	88	62	108
RLC00045	>20 non-nested in all four	106	103	77	86
RLC00046	>20 non-nested in all four	154	147	60	147
RLC00048	>20 non-nested in all four	82	76	87	69
RLC00052	>20 non-nested in all four	97	103	51	102
RLC00054	>20 non-nested in all four	59	68	48	74
RLC00057	>20 non-nested in all four	78	59	74	57
RLC00059	>20 non-nested in all four	52	51	55	53
RLC00062	>20 non-nested in all four	51	42	41	32
RLC00064	>20 non-nested in all four	69	78	36	64
RLC00068	>20 non-nested in all four	32	27	32	32
RLC00069	>20 non-nested in all four	39	43	25	42
RLC00070	>20 non-nested in all four	59	50	36	50
RLC00074	>20 non-nested in all four	55	54	29	57
RLC00075	>20 non-nested in all four	43	30	26	33
RLC00079	>20 non-nested in all four	45	58	51	51
RLC00093	>20 non-nested in all four	35	35	38	44
RLC00097	>20 non-nested in all four	28	23	24	30
RLC00099	>20 non-nested in all four	30	32	36	35
RLX00065	>20 non-nested in all four	69	65	23	70
RLX00094	>20 non-nested in all four	42	48	28	39
RLG00001	>20 non-nested in all four	7514	7632	5931	7711
RLG00003	>20 non-nested in all four	7801	7152	3768	7566
RLG00005	>20 non-nested in all four	1837	1536	530	1744
RLG00006	>20 non-nested in all four	1843	1775	792	1628
RLG00007	>20 non-nested in all four	1601	1557	1195	1573
RLG00008	>20 non-nested in all four	1384	1427	1071	1409
RLG00009	>20 non-nested in all four	814	819	449	775
RLG00010	>20 non-nested in all four	796	792	469	760
RLG00011	>20 non-nested in all four	1174	1179	551	1161
RLG00012	>20 non-nested in all four	698	448	254	431
RLG00017	>20 non-nested in all four	343	274	198	278
RLG00018	>20 non-nested in all four	423	443	466	462
RLG00020	>20 non-nested in all four	286	253	126	244
RLG00021	>20 non-nested in all four	357	387	364	388
RLG00024	>20 non-nested in all four	192	237	114	258
RLG00027	>20 non-nested in all four	93	74	104	341
RLG00028	>20 non-nested in all four	220	231	113	203
RLG00031	>20 non-nested only in B73	127
RLG00035	>20 non-nested only in B74	164
RLG00036	>20 non-nested only in B75	83
RLG00037	>20 non-nested only in B76	103
RLG00038	>20 non-nested only in B77	106
RLG00039	>20 non-nested only in B78	107
RLG00040	>20 non-nested only in B79	111
RLG00043	>20 non-nested only in B80	98
RLG00047	>20 non-nested only in B81	87
RLX13698	>20 non-nested only in B82	55
RLG00051	>20 non-nested only in B83	70
RLG00053	>20 non-nested only in B84	100
RLG00055	>20 non-nested only in B85	67
RLG00056	>20 non-nested only in B86	57
RLG00058	>20 non-nested only in B87	61
RLG00060	>20 non-nested only in B88	81
RLG00061	>20 non-nested only in B89	36
RLG00071	>20 non-nested only in B90	35
RLG00072	>20 non-nested only in B91	37
RLG00078	>20 non-nested only in B92	20
RLG00081	>20 non-nested only in B93	36
RLG00087	>20 non-nested only in B94	29
RLG00089	>20 non-nested only in B95	44
RLG00090	>20 non-nested only in B96	20
RLG00098	>20 non-nested only in B97	32
RLX16782	>20 non-nested only in B98	69
RLC00104	>20 non-nested only in B99	25
RLC00105	>20 non-nested only in B100	26
RLC00116	>20 non-nested only in B101	23
RLG00292	>20 non-nested only in B102	34
RLC00124	>20 non-nested only in B103	23
RLC00125	>20 non-nested only in B104	20
RLC00137	>20 non-nested only in B105	23
RLC00143	>20 non-nested only in B106	25
RLC00146	>20 non-nested only in B107	22
RLC00148	>20 non-nested only in B108	26
RLC00149	>20 non-nested only in B109	20
RLC00158	>20 non-nested only in B110	22
RLC00161	>20 non-nested only in B111	20
RLC00176	>20 non-nested only in B112	20
RLC00184	>20 non-nested only in B113	20
RLX13529	>20 non-nested only in B114	93
RLG01210	>20 non-nested only in B115	22
RLX00144	>20 non-nested only in B116	22
RLX00168	>20 non-nested only in B117	23
RLX00172	>20 non-nested only in B118	20
RLG00103	>20 non-nested only in B119	32
RLG00107	>20 non-nested only in B120	29
RLG00109	>20 non-nested only in B121	24
RLG00110	>20 non-nested only in B122	27
RLG00111	>20 non-nested only in B123	30
RLG00113	>20 non-nested only in B124	21
RLG00114	>20 non-nested only in B125	25
RLG00121	>20 non-nested only in B126	26
RLG00131	>20 non-nested only in B127	25
RLG00132	>20 non-nested only in B128	21
RLG00136	>20 non-nested only in B129	24
RLX17675	>20 non-nested only in B130	49
RLG00142	>20 non-nested only in B131	21
RLG00159	>20 non-nested only in B132	22
RLG00620	>20 non-nested only in B133	116
RLC00002	>20 non-nested only in B134	8561
RLC00004	>20 non-nested only in B135	5804
RLC00013	>20 non-nested only in B136	584
RLC00014	>20 non-nested only in B137	493
RLC00015	>20 non-nested only in B138	426
RLC00016	>20 non-nested only in B139	411
RLC00019	>20 non-nested only in B140	312
RLC00022	>20 non-nested only in B141	254
RLC00023	>20 non-nested only in B142	157
RLC00025	>20 non-nested only in B143	264
RLC00026	>20 non-nested only in B144	236
RLC00029	>20 non-nested only in B145	244
RLC00030	>20 non-nested only in B146	336
RLC00032	>20 non-nested only in B147	273
RLC00033	>20 non-nested only in B148	194
RLC00034	>20 non-nested only in B149	252
RLC00041	>20 non-nested only in B150	121
RLC00042	>20 non-nested only in B151	101
RLC00044	>20 non-nested only in B152	93
RLC00045	>20 non-nested only in B153	106
RLC00046	>20 non-nested only in B154	154
RLC00048	>20 non-nested only in B155	82
RLC00049	>20 non-nested only in B156	45
RLC00050	>20 non-nested only in B157	57
RLC00052	>20 non-nested only in B158	97
RLC00054	>20 non-nested only in B159	59
RLC00057	>20 non-nested only in B160	78
RLC00059	>20 non-nested only in B161	52
RLC00062	>20 non-nested only in B162	51
RLC00063	>20 non-nested only in B163	35
RLC00064	>20 non-nested only in B164	69
RLC00068	>20 non-nested only in B165	32
RLC00069	>20 non-nested only in B166	39
RLC00070	>20 non-nested only in B167	59
RLC00074	>20 non-nested only in B168	55
RLC00075	>20 non-nested only in B169	43
RLC00079	>20 non-nested only in B170	45
RLC00080	>20 non-nested only in B171	23
RLC00083	>20 non-nested only in B172	22
RLC00086	>20 non-nested only in B173	37
RLC00093	>20 non-nested only in B174	35
RLC00097	>20 non-nested only in B175	28
RLC00099	>20 non-nested only in B176	30
RLX00824	>20 non-nested only in B177	41
RLX00065	>20 non-nested only in B178	69
RLX00066	>20 non-nested only in B179	28
RLX00094	>20 non-nested only in B180	42
RLX00095	>20 non-nested only in B181	21
RLG00001	>20 non-nested only in B182	7514
RLG00003	>20 non-nested only in B183	7801
RLG00005	>20 non-nested only in B184	1837
RLG00006	>20 non-nested only in B185	1843
RLG00007	>20 non-nested only in B186	1601
RLG00008	>20 non-nested only in B187	1384
RLG00009	>20 non-nested only in B188	814
RLG00010	>20 non-nested only in B189	796
RLG00011	>20 non-nested only in B190	1174
RLG00012	>20 non-nested only in B191	698
RLG00017	>20 non-nested only in B192	343
RLG00018	>20 non-nested only in B193	423
RLG00020	>20 non-nested only in B194	286
RLG00021	>20 non-nested only in B195	357
RLG00024	>20 non-nested only in B196	192
RLG00027	>20 non-nested only in B197	93
RLG00028	>20 non-nested only in B198	220
RLG00031	>20 non-nested only in B199	127
RLG00035	>20 non-nested only in B200	164
RLG00036	>20 non-nested only in B201	83
RLG00037	>20 non-nested only in B202	103
RLG00038	>20 non-nested only in B203	106
RLG00039	>20 non-nested only in B204	107
RLG00040	>20 non-nested only in B205	111
RLG00043	>20 non-nested only in B206	98
RLG00047	>20 non-nested only in B207	87
RLX13698	>20 non-nested only in B208	55
RLG00051	>20 non-nested only in B209	70
RLG00053	>20 non-nested only in B210	100
RLG00055	>20 non-nested only in B211	67
RLG00056	>20 non-nested only in B212	57
RLG00058	>20 non-nested only in B213	61
RLG00060	>20 non-nested only in B214	81
RLG00061	>20 non-nested only in B215	36
RLG00071	>20 non-nested only in B216	35
RLG00072	>20 non-nested only in B217	37
RLG00078	>20 non-nested only in B218	20
RLG00081	>20 non-nested only in B219	36
RLG00087	>20 non-nested only in B220	29
RLG00089	>20 non-nested only in B221	44
RLG00090	>20 non-nested only in B222	20
RLG00098	>20 non-nested only in B223	32
RLX16782	>20 non-nested only in B224	69
RLC00104	>20 non-nested only in B225	25
RLC00105	>20 non-nested only in B226	26
RLC00116	>20 non-nested only in B227	23
RLG00292	>20 non-nested only in B228	34
RLC00124	>20 non-nested only in B229	23
RLC00125	>20 non-nested only in B230	20
RLC00137	>20 non-nested only in B231	23
RLC00143	>20 non-nested only in B232	25
RLC00146	>20 non-nested only in B233	22
RLC00148	>20 non-nested only in B234	26
RLC00149	>20 non-nested only in B235	20
RLC00158	>20 non-nested only in B236	22
RLC00161	>20 non-nested only in B237	20
RLC00176	>20 non-nested only in B238	20
RLC00184	>20 non-nested only in B239	20
RLX13529	>20 non-nested only in B240	93
RLG01210	>20 non-nested only in B241	22
RLX00144	>20 non-nested only in B242	22
RLX00168	>20 non-nested only in B243	23
RLX00172	>20 non-nested only in B244	20
RLG00103	>20 non-nested only in B245	32
RLG00107	>20 non-nested only in B246	29
RLG00109	>20 non-nested only in B247	24
RLG00110	>20 non-nested only in B248	27
RLG00111	>20 non-nested only in B249	30
RLG00113	>20 non-nested only in B250	21
RLG00114	>20 non-nested only in B251	25
RLG00121	>20 non-nested only in B252	26
RLG00131	>20 non-nested only in B253	25
RLG00132	>20 non-nested only in B254	21
RLG00136	>20 non-nested only in B255	24
RLX17675	>20 non-nested only in B256	49
RLG00142	>20 non-nested only in B257	21
RLG00159	>20 non-nested only in B258	22
RLG00620	>20 non-nested only in B259	116
RLC00002	>20 non-nested only in B260	8561
RLC00004	>20 non-nested only in B261	5804
RLC00013	>20 non-nested only in B262	584
RLC00014	>20 non-nested only in B263	493
RLC00015	>20 non-nested only in B264	426
RLC00016	>20 non-nested only in B265	411
RLC00019	>20 non-nested only in B266	312
RLC00022	>20 non-nested only in B267	254
RLC00023	>20 non-nested only in B268	157
RLC00025	>20 non-nested only in B269	264
RLC00026	>20 non-nested only in B270	236
RLC00029	>20 non-nested only in B271	244
RLC00030	>20 non-nested only in B272	336
RLC00032	>20 non-nested only in B273	273
RLC00033	>20 non-nested only in B274	194
RLC00034	>20 non-nested only in B275	252
RLC00041	>20 non-nested only in B276	121
RLC00042	>20 non-nested only in B277	101
RLC00044	>20 non-nested only in B278	93
RLC00045	>20 non-nested only in B279	106
RLC00046	>20 non-nested only in B280	154
RLC00048	>20 non-nested only in B281	82
RLC00049	>20 non-nested only in B282	45
RLC00050	>20 non-nested only in B283	57
RLC00052	>20 non-nested only in B284	97
RLC00054	>20 non-nested only in B285	59
RLC00057	>20 non-nested only in B286	78
RLC00059	>20 non-nested only in B287	52
RLC00062	>20 non-nested only in B288	51
RLC00063	>20 non-nested only in B289	35
RLC00064	>20 non-nested only in B290	69
RLC00068	>20 non-nested only in B291	32
RLC00069	>20 non-nested only in B292	39
RLC00070	>20 non-nested only in B293	59
RLC00074	>20 non-nested only in B294	55
RLC00075	>20 non-nested only in B295	43
RLC00079	>20 non-nested only in B296	45
RLC00080	>20 non-nested only in B297	23
RLC00083	>20 non-nested only in B298	22
RLC00086	>20 non-nested only in B299	37
RLC00093	>20 non-nested only in B300	35
RLC00097	>20 non-nested only in B301	28
RLC00099	>20 non-nested only in B302	30
RLX00824	>20 non-nested only in B303	41
RLX00065	>20 non-nested only in B304	69
RLX00066	>20 non-nested only in B305	28
RLX00094	>20 non-nested only in B306	42
RLX00095	>20 non-nested only in B307	21
RLG00001	>20 non-nested only in B308	7514
RLG00003	>20 non-nested only in B309	7801
RLG00005	>20 non-nested only in B310	1837
RLG00006	>20 non-nested only in B311	1843
RLG00007	>20 non-nested only in B312	1601
RLG00008	>20 non-nested only in B313	1384
RLG00009	>20 non-nested only in B314	814
RLG00010	>20 non-nested only in B315	796
RLG00011	>20 non-nested only in B316	1174
RLG00012	>20 non-nested only in B317	698
RLG00017	>20 non-nested only in B318	343
RLG00018	>20 non-nested only in B319	423
RLG00020	>20 non-nested only in B320	286
RLG00021	>20 non-nested only in B321	357
RLG00024	>20 non-nested only in B322	192
RLG00027	>20 non-nested only in B323	93
RLG00028	>20 non-nested only in B324	220
RLG00037	>20 non-nested only in B325	103
RLX13698	>20 non-nested only in B326	55
RLG00056	>20 non-nested only in B327	57
RLG00061	>20 non-nested only in B328	36
RLG00071	>20 non-nested only in B329	35
RLG00090	>20 non-nested only in B330	20
RLX16782	>20 non-nested only in B331	69
RLC00104	>20 non-nested only in B332	25
RLC00105	>20 non-nested only in B333	26
RLC00116	>20 non-nested only in B334	23
RLG00292	>20 non-nested only in B335	34
RLC00125	>20 non-nested only in B336	20
RLC00137	>20 non-nested only in B337	23
RLC00146	>20 non-nested only in B338	22
RLC00148	>20 non-nested only in B339	26
RLC00149	>20 non-nested only in B340	20
RLC00158	>20 non-nested only in B341	22
RLC00161	>20 non-nested only in B342	20
RLC00176	>20 non-nested only in B343	20
RLC00184	>20 non-nested only in B344	20
RLG01210	>20 non-nested only in B345	22
RLX00144	>20 non-nested only in B346	22
RLX00168	>20 non-nested only in B347	23
RLX00172	>20 non-nested only in B348	20
RLG00113	>20 non-nested only in B349	21
RLG00114	>20 non-nested only in B350	25
RLG00121	>20 non-nested only in B351	26
RLG00132	>20 non-nested only in B352	21
RLG00136	>20 non-nested only in B353	24
RLX17675	>20 non-nested only in B354	49
RLG00142	>20 non-nested only in B355	21
RLG00159	>20 non-nested only in B356	22
RLG00620	>20 non-nested only in B357	116
RLC00023	>20 non-nested only in B358	157
RLC00049	>20 non-nested only in B359	45
RLC00050	>20 non-nested only in B360	57
RLC00063	>20 non-nested only in B361	35
RLC00080	>20 non-nested only in B362	23
RLC00083	>20 non-nested only in B363	22
RLC00086	>20 non-nested only in B364	37
RLX00824	>20 non-nested only in B365	41
RLX00066	>20 non-nested only in B366	28
RLX00095	>20 non-nested only in B367	21
RLG00037	>20 non-nested only in B368	103
RLX13698	>20 non-nested only in B369	55
RLG00056	>20 non-nested only in B370	57
RLG00061	>20 non-nested only in B371	36
RLG00071	>20 non-nested only in B372	35
RLG00090	>20 non-nested only in B373	20
RLX16782	>20 non-nested only in B374	69
RLC00104	>20 non-nested only in B375	25
RLC00105	>20 non-nested only in B376	26
RLC00116	>20 non-nested only in B377	23
RLG00292	>20 non-nested only in B378	34
RLC00125	>20 non-nested only in B379	20
RLC00137	>20 non-nested only in B380	23
RLC00146	>20 non-nested only in B381	22
RLC00148	>20 non-nested only in B382	26
RLC00149	>20 non-nested only in B383	20
RLC00158	>20 non-nested only in B384	22
RLC00161	>20 non-nested only in B385	20
RLC00176	>20 non-nested only in B386	20
RLC00184	>20 non-nested only in B387	20
RLG01210	>20 non-nested only in B388	22
RLX00144	>20 non-nested only in B389	22
RLX00168	>20 non-nested only in B390	23
RLX00172	>20 non-nested only in B391	20
RLG00113	>20 non-nested only in B392	21
RLG00114	>20 non-nested only in B393	25
RLG00121	>20 non-nested only in B394	26
RLG00132	>20 non-nested only in B395	21
RLG00136	>20 non-nested only in B396	24
RLX17675	>20 non-nested only in B397	49
RLG00142	>20 non-nested only in B398	21
RLG00159	>20 non-nested only in B399	22
RLG00620	>20 non-nested only in B400	116
RLC00023	>20 non-nested only in B401	157
RLC00049	>20 non-nested only in B402	45
RLC00050	>20 non-nested only in B403	57
RLC00063	>20 non-nested only in B404	35
RLC00080	>20 non-nested only in B405	23
RLC00083	>20 non-nested only in B406	22
RLC00086	>20 non-nested only in B407	37
RLX00824	>20 non-nested only in B408	41
RLX00066	>20 non-nested only in B409	28
RLX00095	>20 non-nested only in B410	21
